# Supplementary material
Source: publisher site journal article supplement (https://www.dovepress.com/article/294365)

Supplement Fig. 1: The target site of miRNA-4715-3p (yellow arrow) on XPG (ERCC5)


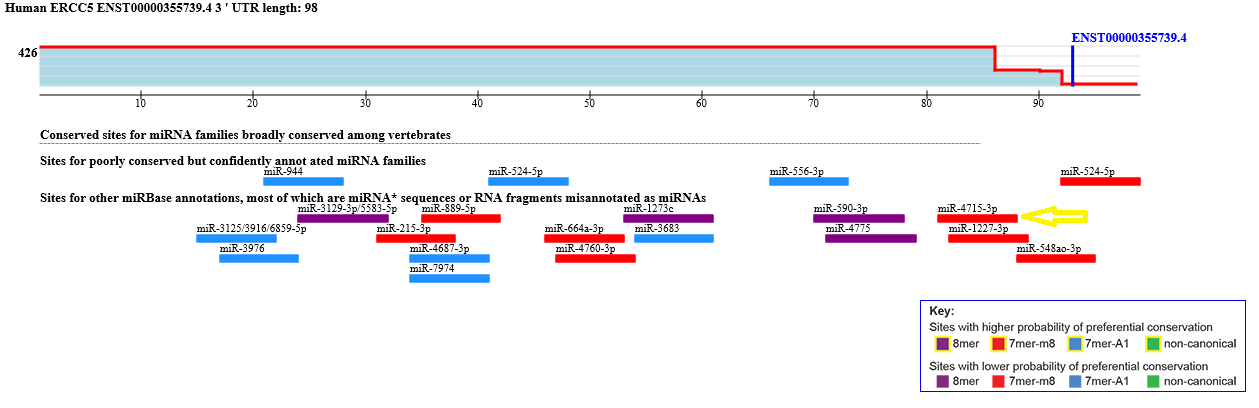


Supplement Fig. 2 : The binding site sequence of miRNA-4715-3p on XPG (ERCC5)


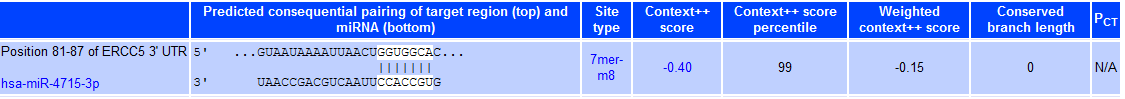


Supplement Fig. 3: The influence of rs873601 on miRNA-4715-3p binding activity


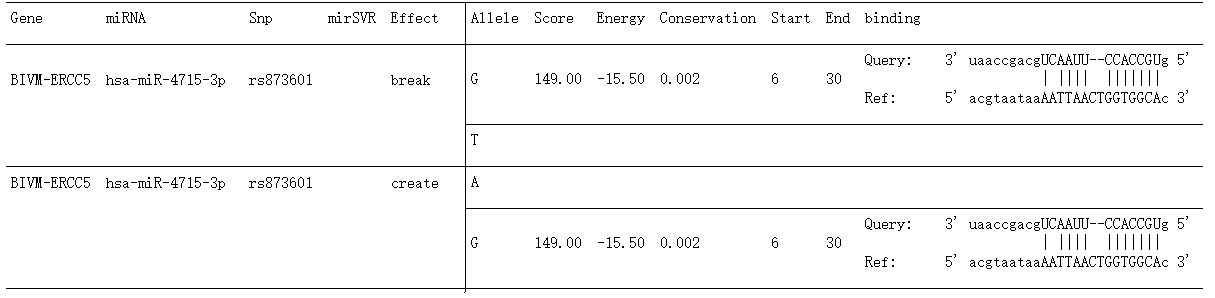

Supplement: Supplementary file 1 [file get_supplementary_file.php]
